# Supplementary material
Source: PubMed Central journal article supplement (PMC2747347)

1.1E+04

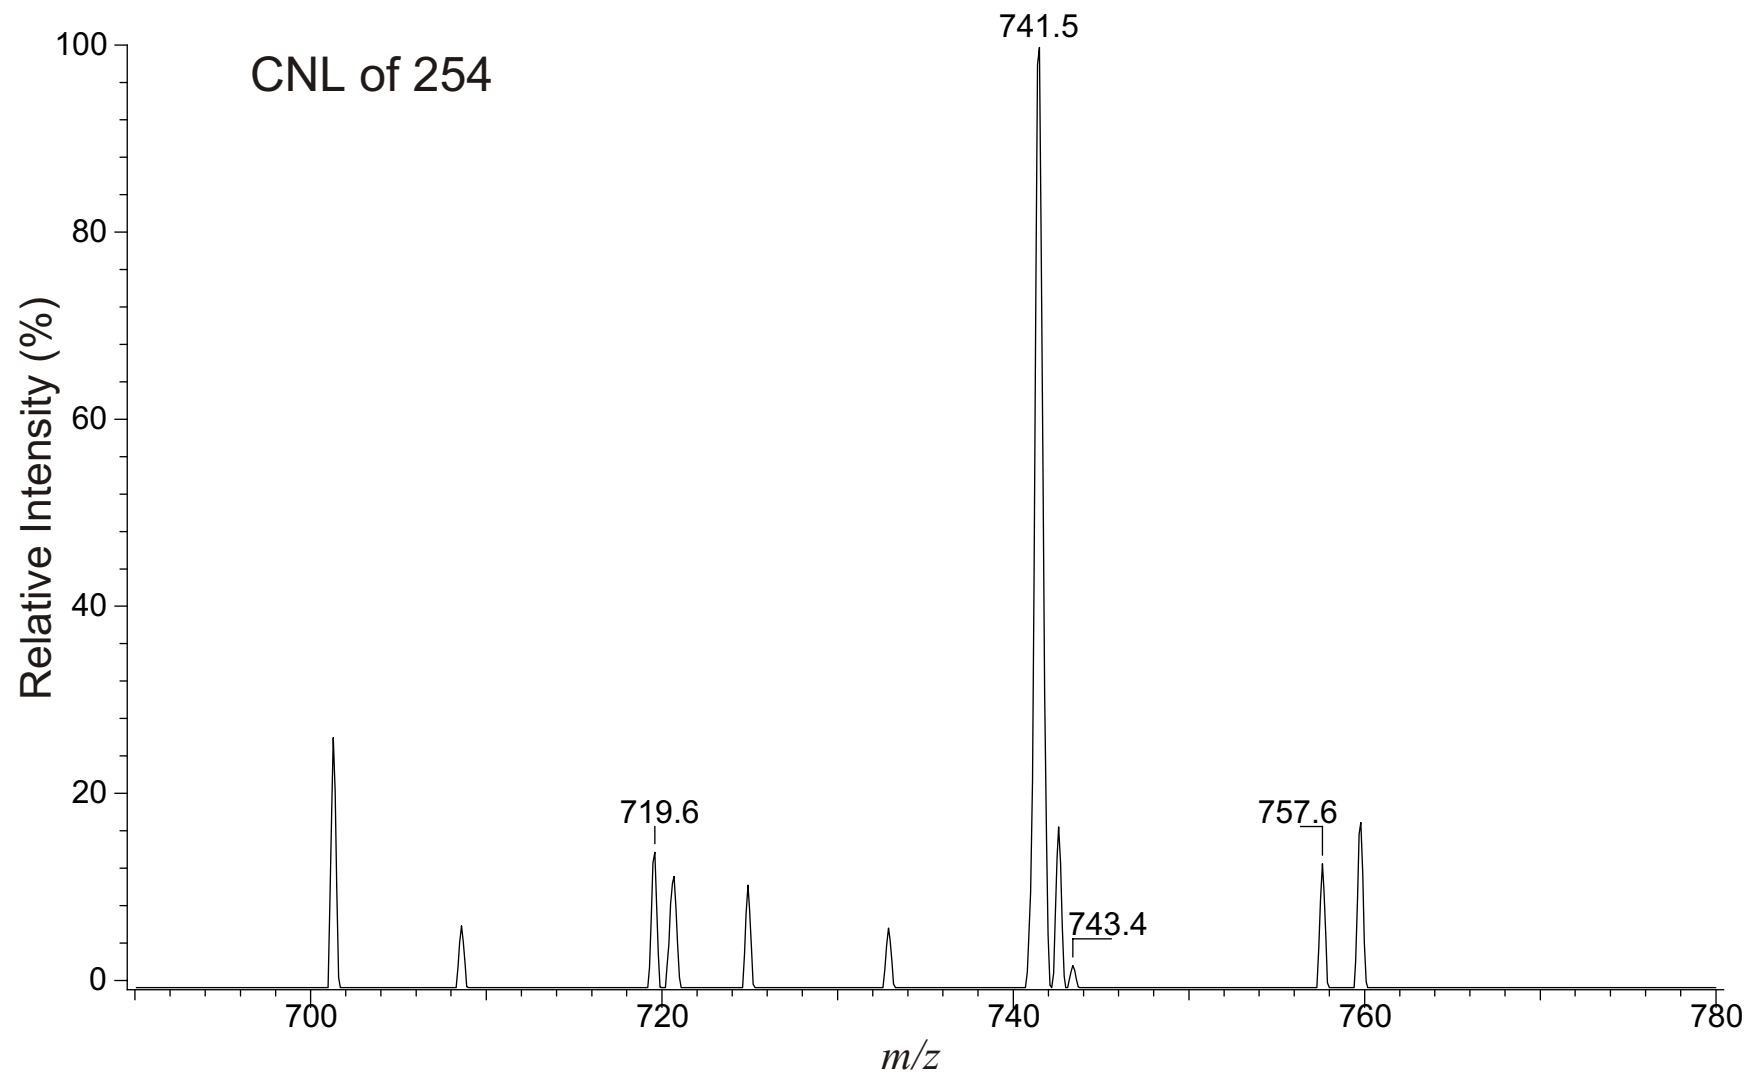

Supplement: NIHMS21218-supplement-01.pdf [file NIHMS21218-supplement-01.pdf]
